# Supplementary material for: Enhancing BTX selectivity of the syngas to aromatics reaction through silylation of CTAB pretreated ZSM-5
Source: Royal Society of Chemistry journal article supplement (doi:10.1039/d1cy00781e), 2021-01-01
Supplement: d1cy00781e1.pdf [file d1cy00781e1.pdf]

## *Supplementary Material*

### **Enhancing BTX selectivity for syngas to aromatics through silylation of CTAB pretreated ZSM-5**

Yue Fang<sup>a</sup>, Zhen Huang<sup>a\*</sup>, Sheng Wang<sup>a</sup>, Haibing Sheng<sup>a</sup>, Weimin Hua<sup>a</sup>, Yinghong  
Yue<sup>a</sup>, Wei Shen<sup>a</sup> and Hualong Xu<sup>a\*</sup>

*<sup>a</sup> Department of Chemistry, Shanghai Key Laboratory of Molecular Catalysis and  
Innovative Materials and Laboratory of Advanced Materials, Collaborative  
Innovation Center of Chemistry for Energy Materials, Fudan University, Shanghai  
200433, P.R. China*

*\* Corresponding authors. Tel.: +86 21 31242410; E-mail: huangzhen@fudan.edu.cn;  
shuhl@fudan.edu.cn;*

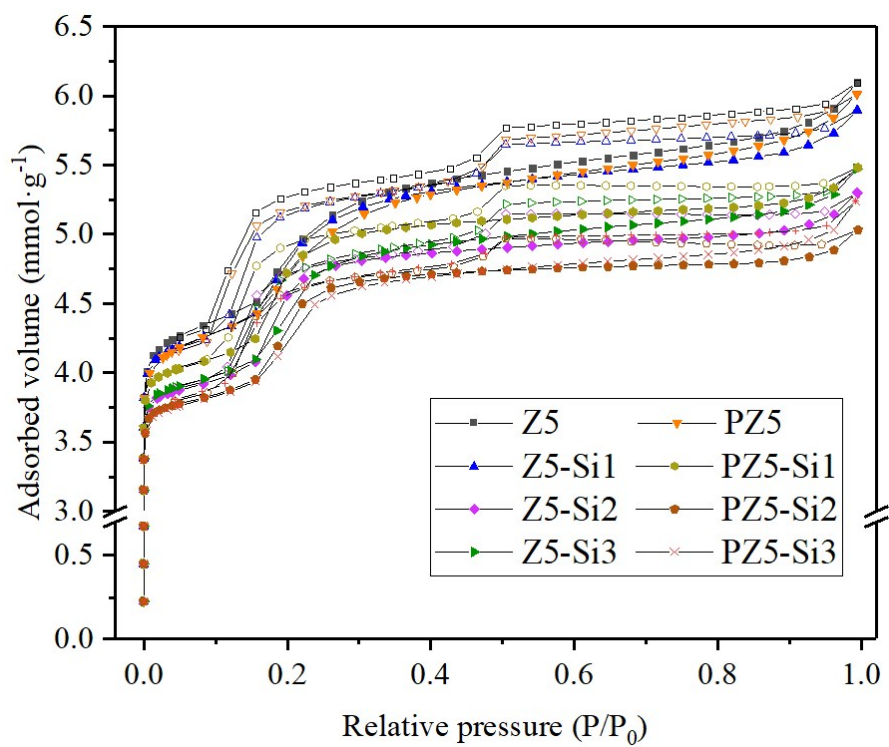

**Fig. S1.** N<sub>2</sub> adsorption-desorption isotherms of ZSM-5 samples.

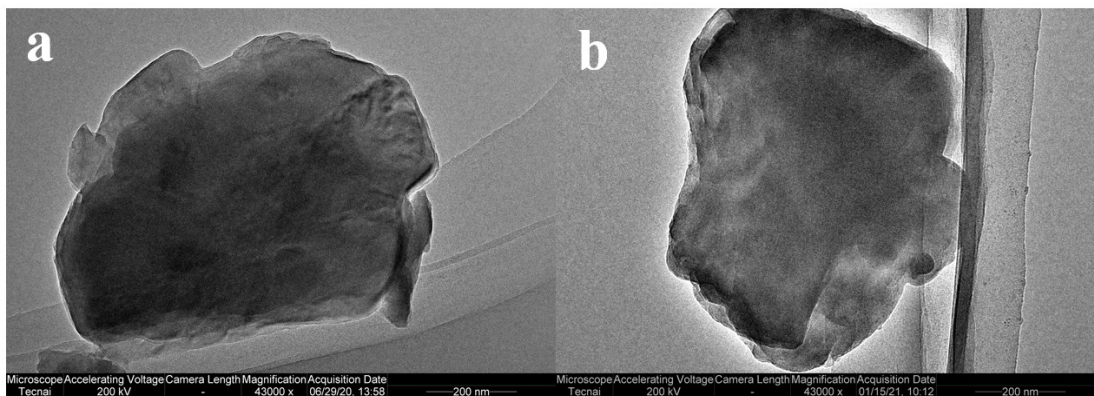

**Fig. S2.** TEM images of a) Z5-Si3, b) PZ5-Si3.

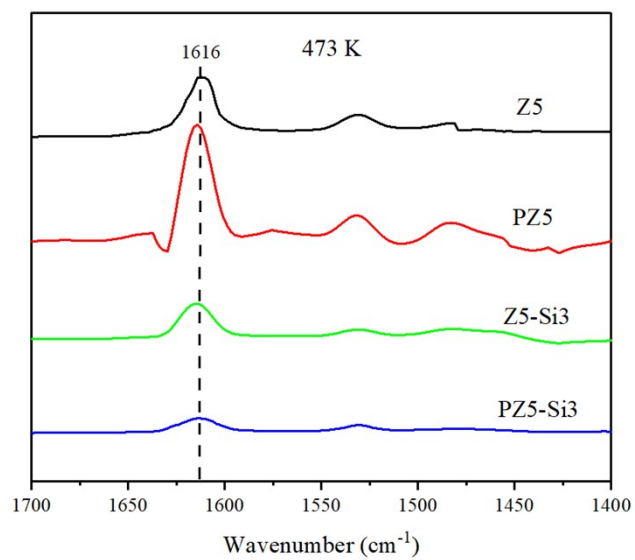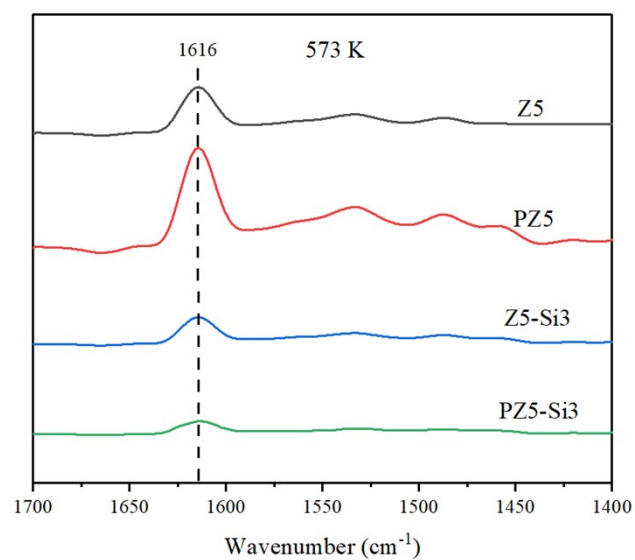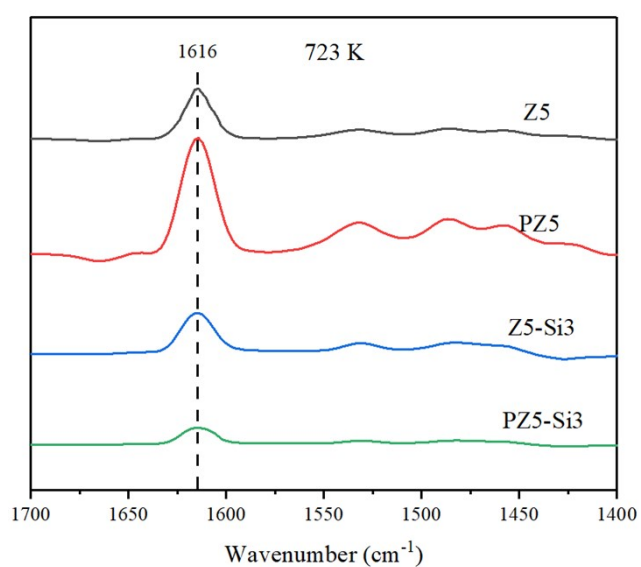

**Fig. S3.** 2, 6-DTBPpy-IR spectra of ZSM-5 samples at 473K, 573K and 723K

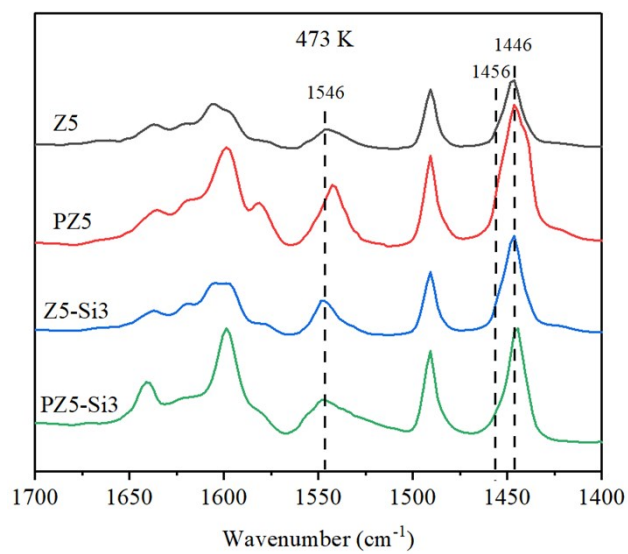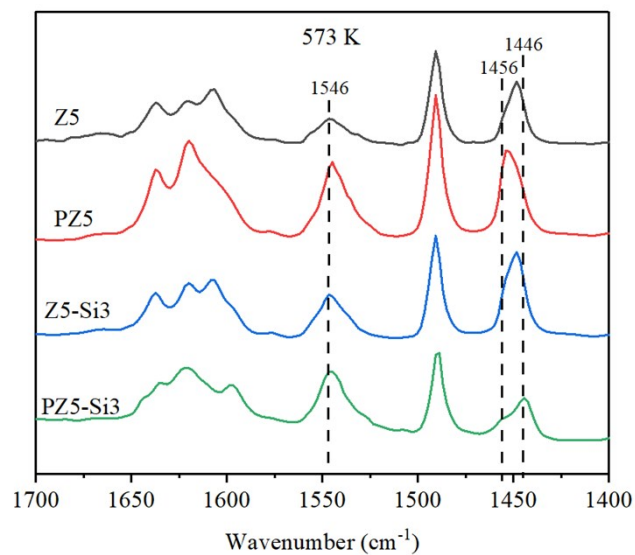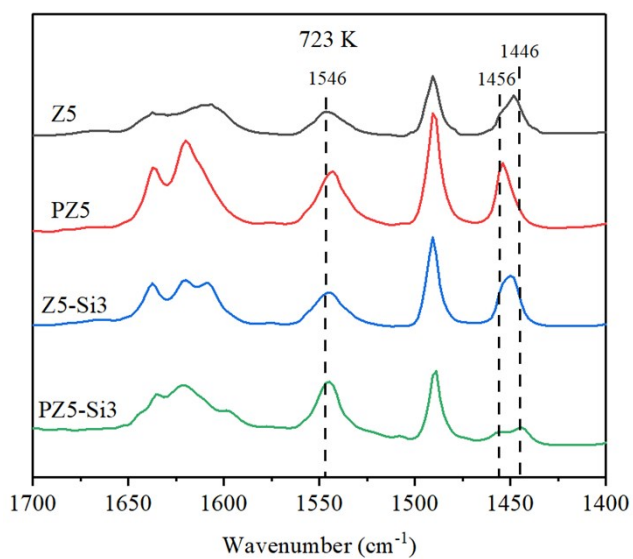

**Fig. S4.** Py-IR spectra of ZSM-5 samples at 473K, 573K and 723K

**Table S1.** Silica loading amount of ZSM-5 obtained by gravimetric method

| sample  | loading SiO <sub>2</sub><br>(wt%) | average<br>loading SiO <sub>2</sub><br>(wt%) | average loading<br>SiO <sub>2</sub> in all cycles<br>(wt%) | Theoretical loading<br>SiO <sub>2</sub> in each cycle<br>(wt%) |
|---------|-----------------------------------|----------------------------------------------|------------------------------------------------------------|----------------------------------------------------------------|
| Z5-Si1  | 1.75                              |                                              |                                                            |                                                                |
| Z5-Si2  | 1.24                              | 1.26                                         |                                                            |                                                                |
| Z5-Si3  | 0.80                              |                                              | 1.19                                                       | 7.15                                                           |
| PZ5-Si1 | 2.05                              |                                              |                                                            |                                                                |
| PZ5-Si2 | 0.65                              | 1.12                                         |                                                            |                                                                |
| PZ5-Si3 | 0.66                              |                                              |                                                            |                                                                |

**Table S2.** Brønsted acid amount of ZSM-5 samples obtained by Py-IR

| □<br>Sample | Total Bronsted acid<br>( $\mu\text{mol}\cdot\text{g}^{-1}$ ) | Acidity ( $\mu\text{mol}\cdot\text{g}^{-1}$ ) |                |                |
|-------------|--------------------------------------------------------------|-----------------------------------------------|----------------|----------------|
|             |                                                              | W <sub>B</sub>                                | M <sub>B</sub> | S <sub>B</sub> |
| Z5          | 120                                                          | 19.7                                          | 3.4            | 97             |
| PZ5         | 324                                                          | 60.6                                          | 42.1           | 222            |
| Z5-Si3      | 178                                                          | 26.2                                          | 9.8            | 142            |
| PZ5-Si3     | 291                                                          | 92.4                                          | 19.8           | 179            |

**Table S3.** Catalytic performances of ceria-zirconia solid solution <sup>a</sup>

| Sample   | X <sub>CO</sub><br>(%) | S <sub>CO2</sub><br>(%) | Hydrocarbon distribution (%) |                                |                                |                           |           |
|----------|------------------------|-------------------------|------------------------------|--------------------------------|--------------------------------|---------------------------|-----------|
|          |                        |                         | CH <sub>4</sub>              | C <sub>2-4,</sub> <sup>≠</sup> | C <sub>2-4,</sub> <sup>0</sup> | Aliphatic C <sub>5+</sub> | Aromatics |
| CZS 673K | 5.8                    | 42.2                    | 12.1                         | 54.6                           | 9.7                            | 22.3                      | 1.3       |
| CZS 723K | 12.4                   | 39.8                    | 14.6                         | 25.7                           | 22.0                           | 37.0                      | 0.7       |

<sup>a</sup> Reaction conditions: H<sub>2</sub>/CO/Ar = 48/48/4, 3.6 MPa, GHSV= 1200 ml<sub>syngas</sub> / g<sub>CZS</sub>·h. X<sub>CO</sub> refers to CO conversion; S<sub>CO2</sub> refers to CO<sub>2</sub> selectivity.
